# Supplementary material for: Exploring the oxidative stress response mechanism triggered by environmental water samples
Source: Royal Society of Chemistry journal article supplement (doi:10.1039/c6em00541a), 2016-12-15
Supplement: c6em00541a1.pdf [file c6em00541a1.pdf]

**Electronic Supplementary Information: Exploring the oxidative stress response mechanism triggered by environmental water samples**

Peta A. Neale, Maud E. S. Achard, Beate I. Escher, Frederic D. L. Leusch

**Table S1:** Properties of chemicals detected in the water samples and known to be active in the ARE GeneBLAzer assay.

| <b>Chemical</b>   | <b>CAS No.</b> | <b>Molecular Weight (g/mol)</b> | <b>EC<sub>IR1.5,ox stress</sub> (M) ± standard deviation*</b> |
|-------------------|----------------|---------------------------------|---------------------------------------------------------------|
| 2,4-Dinitrophenol | 51-28-5        | 184.11                          | $4.34 \times 10^{-5} \pm 1.14 \times 10^{-5}$                 |
| Caffeine          | 58-08-2        | 194.19                          | $9.33 \times 10^{-6} \pm 9.57 \times 10^{-7}$                 |
| Diclofenac        | 15307-86-5     | 296.15                          | $3.98 \times 10^{-5} \pm 1.05 \times 10^{-5}$                 |
| Genistein         | 446-72-0       | 270.24                          | $3.32 \times 10^{-6} \pm 7.68 \times 10^{-7}$                 |
| Metolachlor       | 51218-45-2     | 283.80                          | $6.90 \times 10^{-6} \pm 1.07 \times 10^{-6}$                 |

\*EC<sub>IR1.5,ox stress</sub> calculated from raw fluorescence data in the US EPA ToxCast database <sup>1</sup>.

**Section S1:** Preparation of Krebs-Henseleit buffer

Krebs-Henseleit buffer was prepared prior to the experiment using concentrated stock solutions of the different components (Table S2). One millilitre of each stock solution was added to 27 mL of sterile ultrapure water and the pH was adjusted to 7.16 with 240  $\mu$ L 1 M hydrochloric acid. The solution was filter sterilised using 0.22  $\mu$ m Millex-GS syringe filter (Merck Millipore, Bayswater, Australia) and final volume was made up to 40 mL using sterile ultrapure water. The final pH was 7.4.

**Table S2:** Krebs-Henseleit buffer composition.

| <b>Chemical</b>                | <b>CAS No.</b> | <b>Molecular Weight (g/mol)</b> | <b>Stock concentration (mM)</b> | <b>Final concentration (mM)</b> |
|--------------------------------|----------------|---------------------------------|---------------------------------|---------------------------------|
| D-glucose                      | 50-99-7        | 180.16                          | 444                             | 11.1                            |
| Magnesium sulphate (anhydrous) | 7487-88-9      | 120.37                          | 46.9                            | 1.17                            |
| Potassium phosphate monobasic  | 7778-77-0      | 136.09                          | 47.0                            | 1.18                            |
| Potassium chloride             | 7447-40-7      | 74.55                           | 188                             | 4.69                            |
| Sodium chloride                | 7647-14-5      | 58.44                           | 4723                            | 118                             |
| Calcium chloride dihydrate     | 10035-04-8     | 147.01                          | 101                             | 2.54                            |
| Sodium bicarbonate             | 144-55-8       | 84.01                           | 1000                            | 25.0                            |

**Figure S1:** Concentration-effect curves for the water samples in the DCFH-DA assay. The samples were collected during a previous study on the Joint Danube Survey (JDS), with description of sampling sites provided in Neale *et al.* <sup>2</sup>

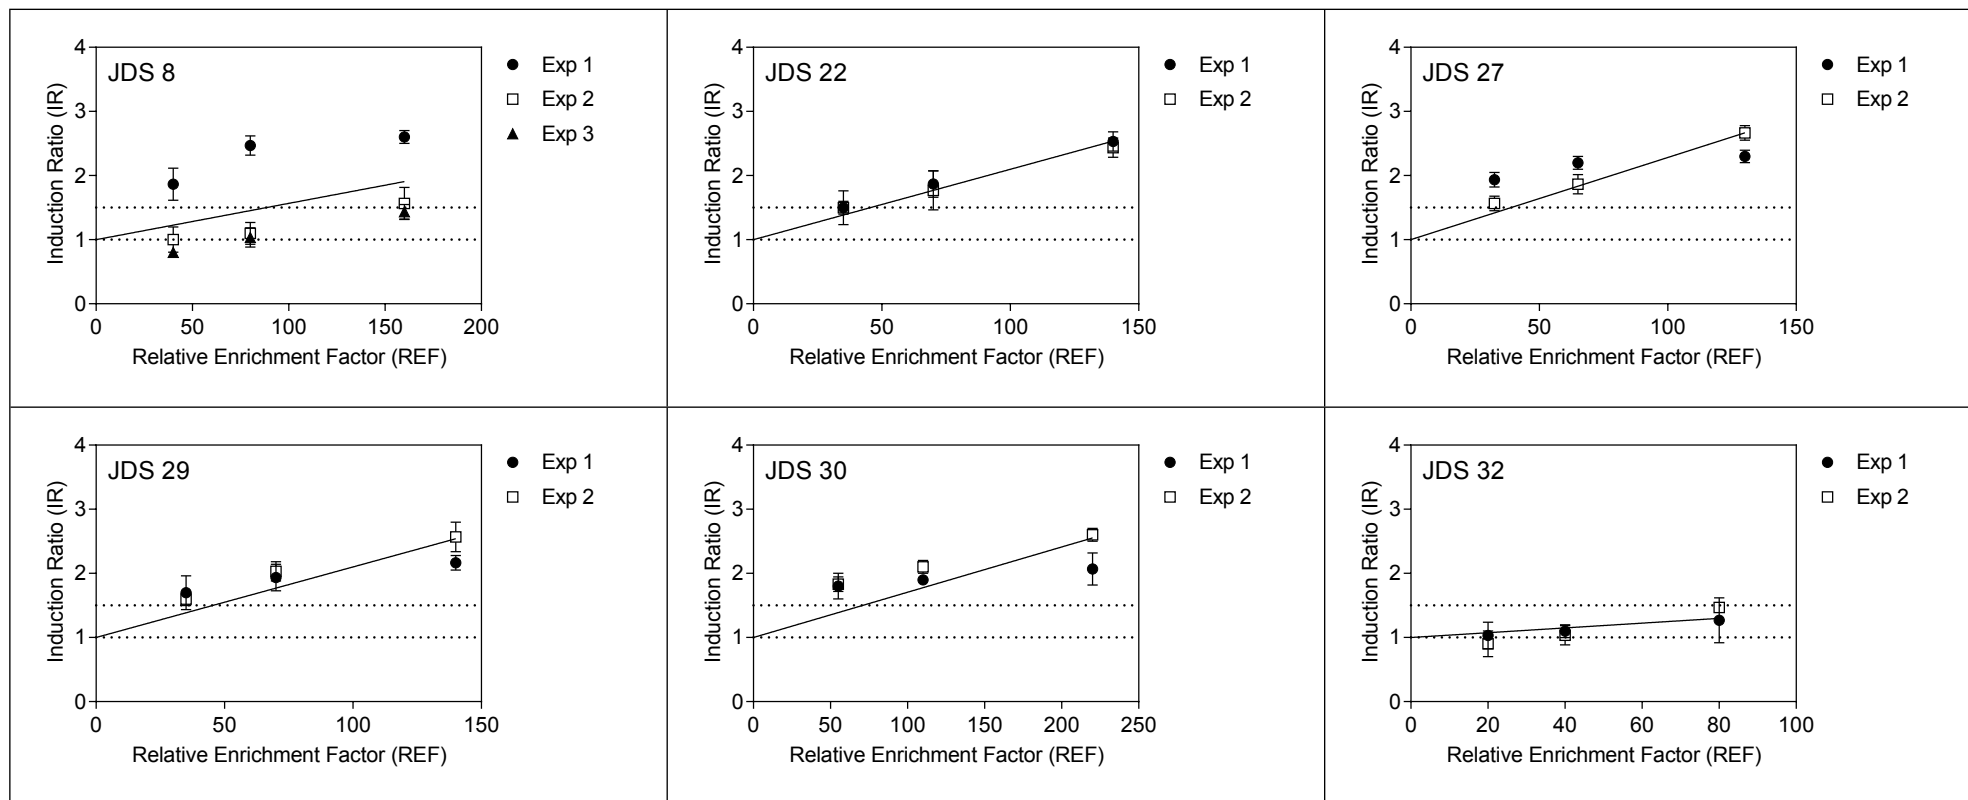

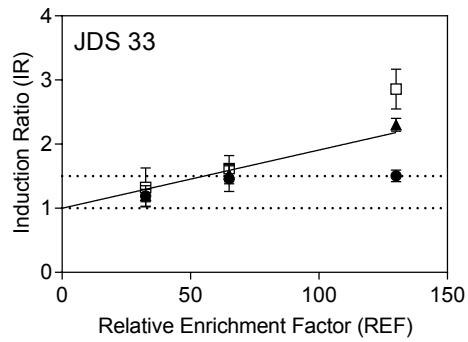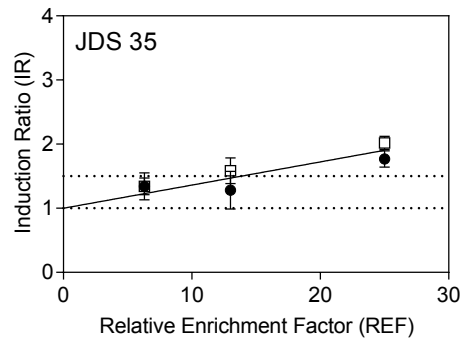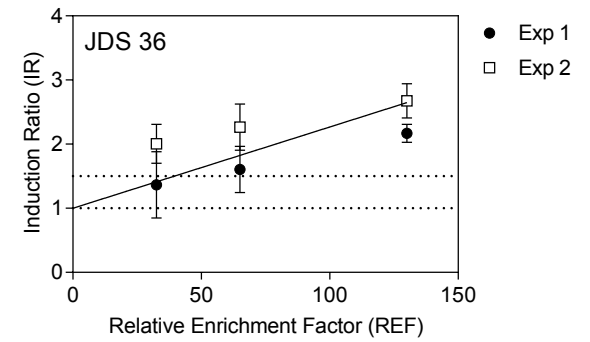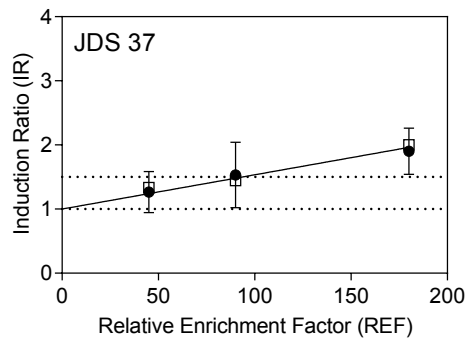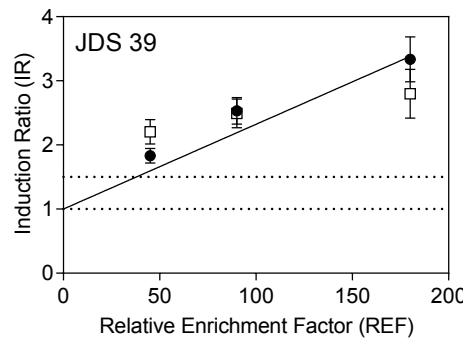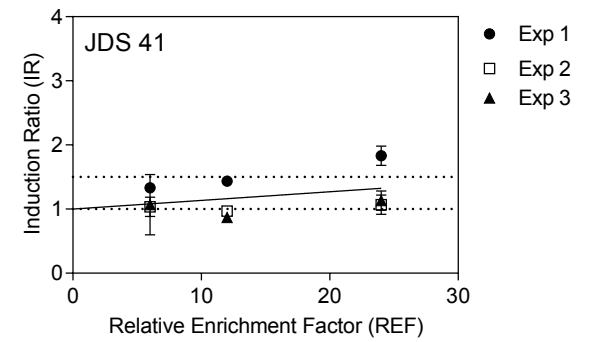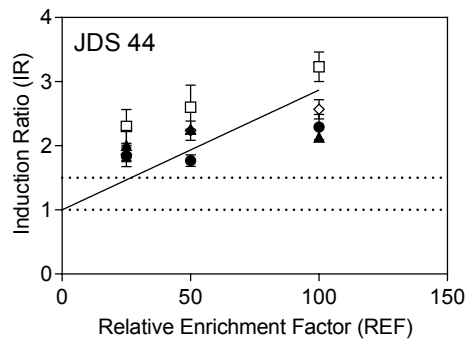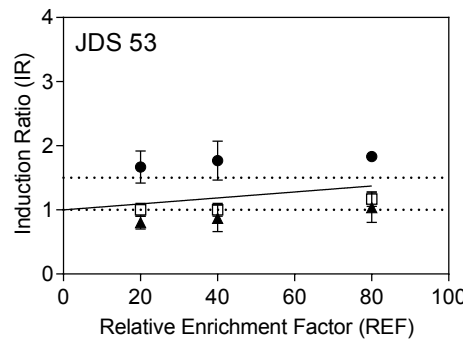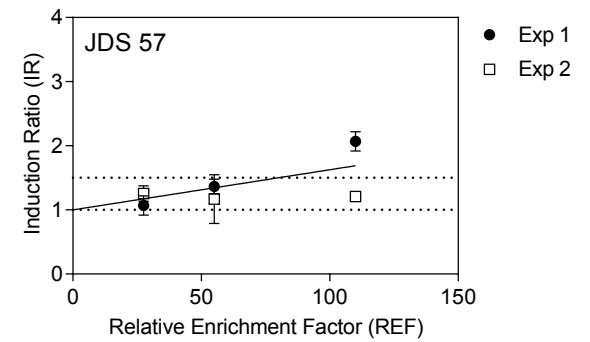

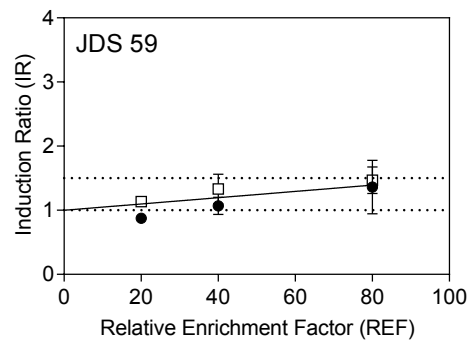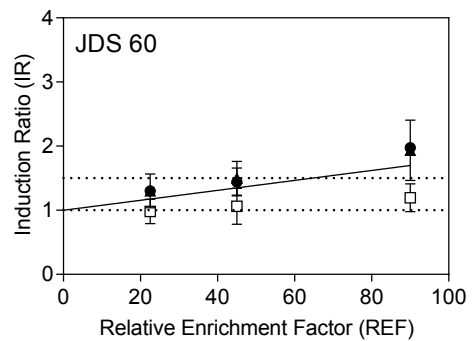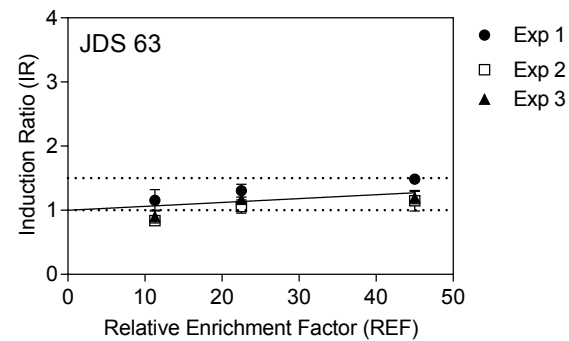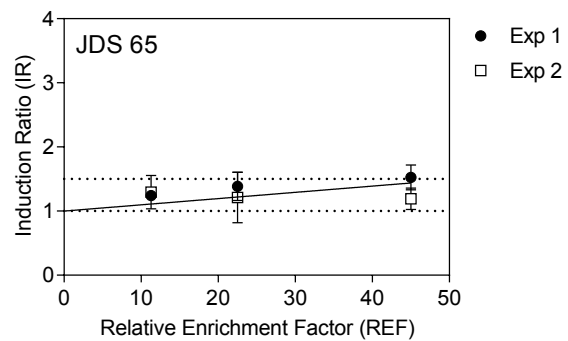

**Figure S2:** Concentration-effect curves for the studied chemicals in the DCFH-DA assay.

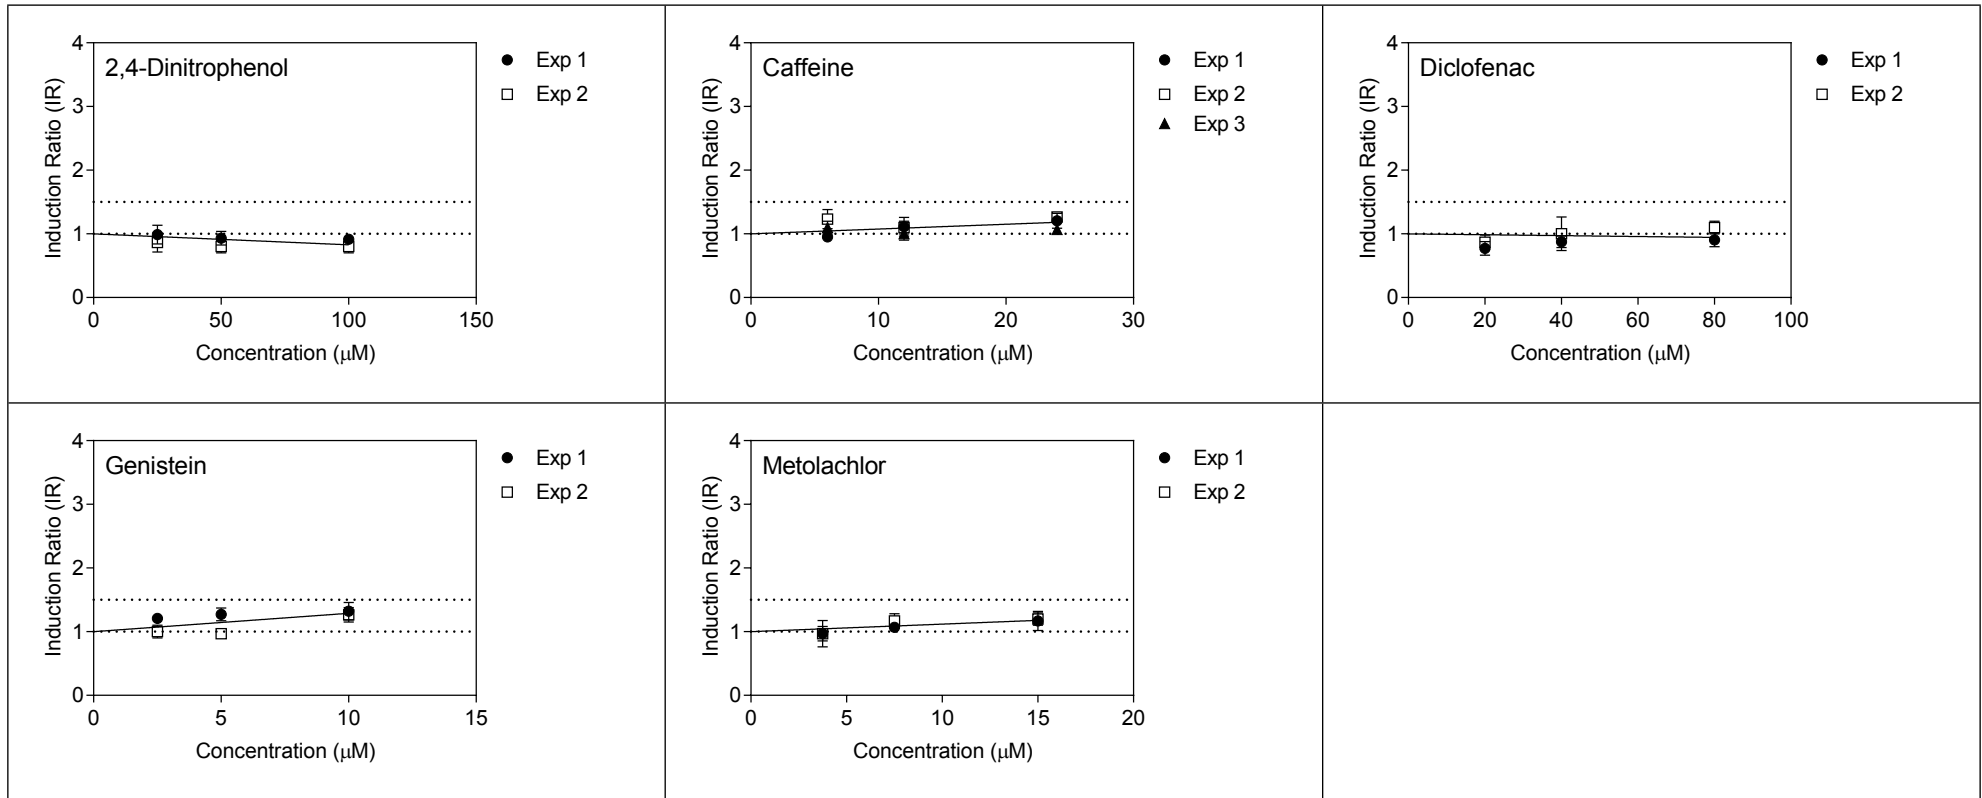

## References

1. US EPA, Interactive Chemical Safety for Sustainability (iCSS) Dashboard v2, <http://actor.epa.gov/dashboard/>, Accessed 5th Jan 2016, <http://actor.epa.gov/dashboard/>, Accessed 5th Jan 2016.
2. P. A. Neale, S. Ait-Aissa, W. Brack, N. Creusot, M. S. Denison, B. Deutschmann, K. Hilscherova, H. Hollert, M. Krauss, J. Novak, T. Schulze, T. B. Seiler, H. Serra, Y. Shao and B. I. Escher, *Environ. Sci. Technol.*, 2015, **49**, 14614-14624.
